# Supplementary material
Source: publisher figshare collection journal article supplement (https://karger.figshare.com/ndownloader/files/14366540)
Supplement: Supplementary file 1 [file 14366540]

**Supplementary table 1.** TP53 expression in non-neoplastic mucosa with and without CAC (biopsy specimens)

| **TP53** | **CAC**  (n = 20) | **Non-CAC**  (n = 20) | **Pvalue** | **Sensitivity** | **Specificity** | **PPV** | **NPV** |
| --- | --- | --- | --- | --- | --- | --- | --- |
| (+) | 2 (10%) | 0 (0%) | 0.49 | 10.0% | 100% | 100% | 52.6% |
| (-) | 18 (90%) | 20 (100%) |

CAC, colitis-associated cancer; NPV, negative predictive value; PPV, positive predictive value
